# Supplementary material for: Nanocrystalline ZnSnN2 Prepared by Reactive Sputtering, Its Schottky Diodes and Heterojunction Solar Cells
Source: Nanomaterials (Basel). 2022 Dec 30;13(1):178. doi: 10.3390/nano13010178 (PMC9823707; doi:10.3390/nano13010178)
Supplement: Supplementary file 1 [file nanomaterials-13-00178-s001.zip › nanomaterials-2063820-supplementary.pdf]

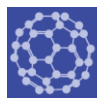

# Nanocrystalline ZnSnN<sub>2</sub> Prepared by Reactive Sputtering, Its Schottky Diodes and Heterojunction Solar Cells

Fan Ye \*, Rui-Tuo Hong †, Yi-Bin Qiu †, Yi-Zhu Xie, Dong-Ping Zhang, Ping Fan and Xing-Min Cai \*

Key Laboratory of Optoelectronic Devices and Systems of Ministry of Education and Guangdong Province, and Shenzhen Key Laboratory of Advanced Thin Films and Applications, College of Physics and Optoelectronic Engineering, Shenzhen University, Shenzhen 518060, China

\* Correspondence: yefan@szu.edu.cn (F.Y.); caixm@szu.edu.cn (X.-M.C.)

† These authors contribute equally to this work.

The steps to prepare the Schottky diodes with the structure of Ag\ITO\ZnSnN<sub>2</sub>\Ag and the solar cells (Ag\ITO\Cu<sub>2</sub>O\ZnSnN<sub>2</sub>\Ag and Ag\ITO\Cu<sub>2</sub>O\ZnSnN<sub>2</sub>\Au) are shown in **Figure S1** (ITO refers to indium tin oxide).

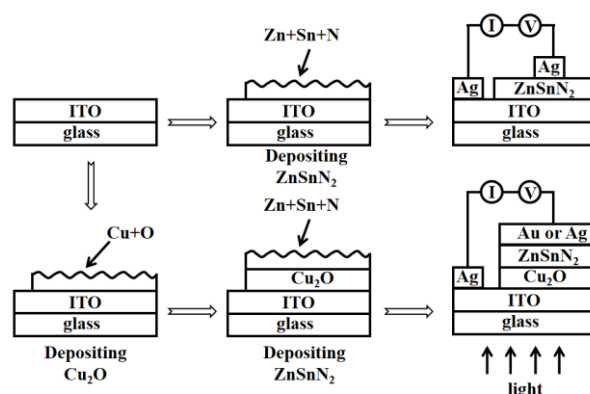

**Figure S1.** The steps to prepare the Schottky diodes and the heterojunction solar cells. The upper three panels are about the Schottky diodes and the lower three are about the heterojunction solar cells.

To see how the substrate temperature will affect the structure of the deposited film, ZnSnN<sub>2</sub> were deposited at different substrate temperatures but the other parameters are exactly the same with those mentioned in the manuscript. **Figure S2** shows the X-ray diffraction patterns of the samples deposited at different substrate temperatures (Room temperature to 300 °C). No diffraction peaks are observed when the substrate temperature is below 100 °C. However, diffraction peaks are observed when the substrate temperature is 100–300 °C. ZnSnN<sub>2</sub> deposited at 100–300 °C are hexagonal [1].

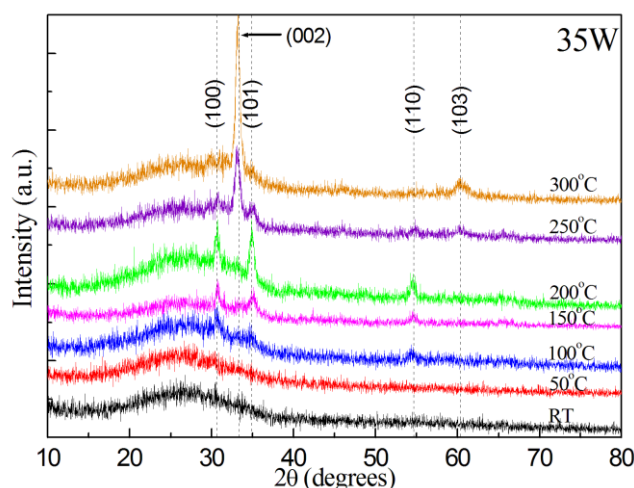

**Figure S2.** XRD patterns of ZnSnN<sub>2</sub> samples deposited at different substrate temperatures.

To see how the sputtering power will affect the structure of the deposited film, the sputtering power was increased to 50W and the substrate temperature of room temperature, 50, 100 and 150 °C were used while other parameters were the same with those in the manuscript. **Figure S3** shows the XRD patterns of the samples prepared at 50W with the substrate temperature to be in the range of room temperature to 150 °C. From **Figure S3**, it can be found that when the sputtering power was 50W, even the samples deposited at room temperature is polycrystalline [1].

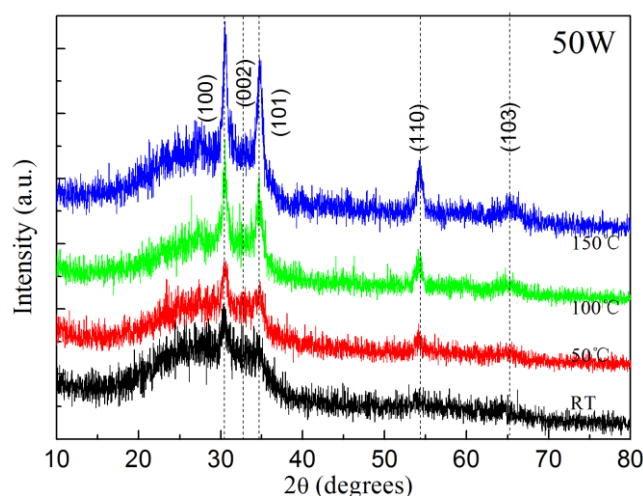

**Figure S3.** The XRD patterns of the samples prepared at 50W and substrate temperature is from room temperature to 150 °C.

The Raman scattering spectra of the samples deposited at 35W and room temperature without annealing or annealed at 300–450 °C are shown in **Figure S4**. No peaks but humps are observed in the Raman scattering spectra of these samples and this is the same with its polycrystalline counterparts [2–3]. Before annealing, humps centered at about 121, 512, 629 and 689 cm<sup>−1</sup> were observed. After annealing, humps centered at 234 cm<sup>−1</sup> appear in some samples and humps centered at 689 cm<sup>−1</sup> disappear in all the annealed samples. These spectra are similar to the calculated high resolution phonon density of states spectrum of ZnSnN<sub>2</sub>[4]. Just like crystalline or polycrystalline ZnSnN<sub>2</sub>, nanocrystalline ZnSnN<sub>2</sub> is also phonon-glass-like and the k-selection rule breaks down.

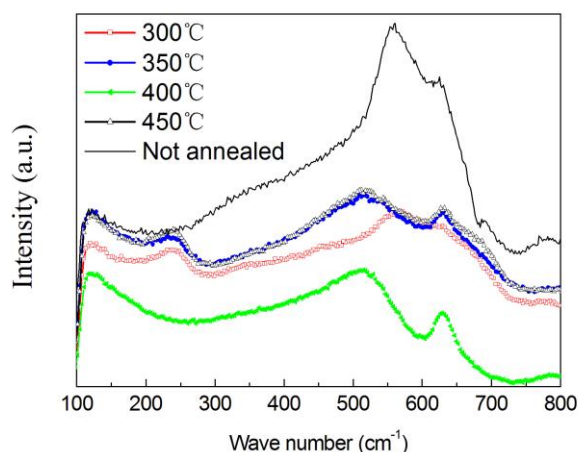

**Figure S4.** Raman scattering spectra of ZnSnN<sub>2</sub> samples without annealing or annealed at 300, 350, 400 and 450 °C.

**Figure S5** shows the current I-voltage V curves of the structure of Ag\ITO\ZnSnN<sub>2</sub>\ITO\Ag. The curves are linear for ZnSnN<sub>2</sub> without annealing or annealed at 300 °C. The samples annealed at 300 °C is found to have smaller resistivity, in agreement with the results obtained with Hall effect measurements. This implies that the rectification or nonlinearity of Ag\ITO\ZnSnN<sub>2</sub>\Ag is due to the contact between ZnSnN<sub>2</sub> and Ag.

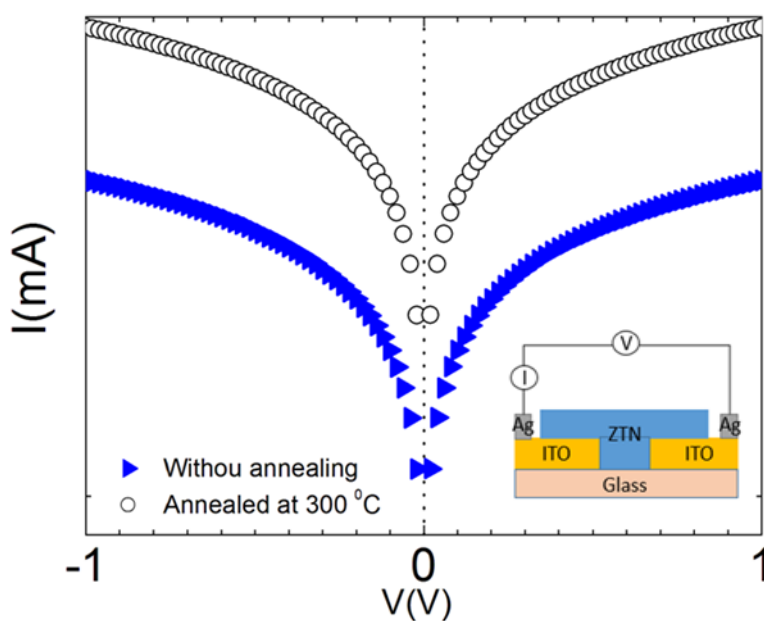

**Figure S5.** The IV curves of Ag/ITO/ZnSnN<sub>2</sub>/ITO/Ag (the inset shows the cross-sectional view of the multilayer structure.).

The ideal band diagram of Ag-ZnSnN<sub>2</sub> at zero bias is shown in **Figure S6 (a)**. The band diagram of Ag-ZnSnN<sub>2</sub> with interface oxide at zero bias is shown in **Figure S6 (b)** [5].

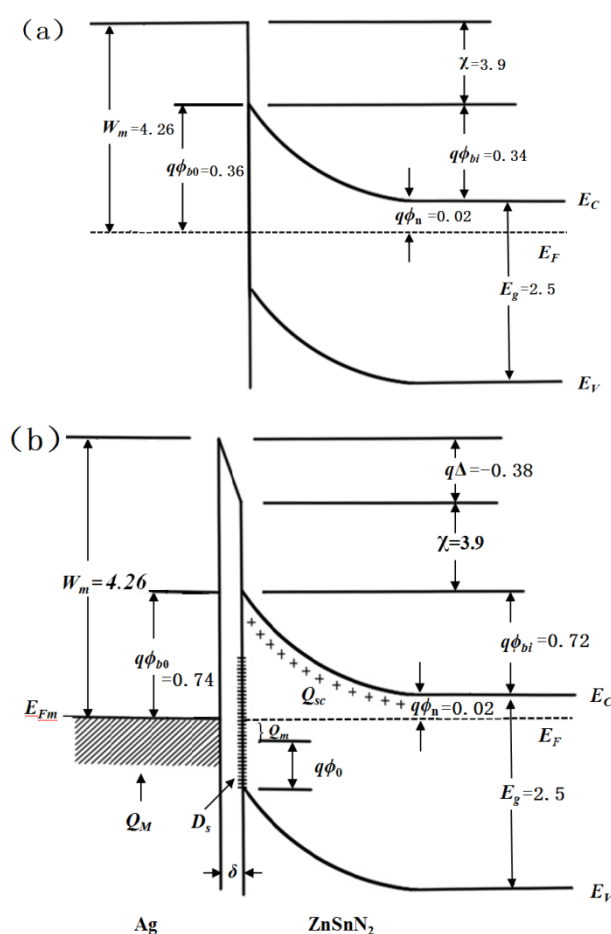

**Figure S6.** (a) The ideal band diagram of Ag-ZnSnN<sub>2</sub>; (b) The band diagram of Ag-ZnSnN<sub>2</sub> with interface states [5].

**Figure S7** shows the statistical distribution of the performance factors of the two types of solar cells. In the horizontal axis, "Au" and "Ag" refer to the data are from the samples with Au and Ag as the electrodes without sample storage, while "Stored" refers to the data are from the samples (Ag\ITO\Cu<sub>2</sub>O\ZnSnN<sub>2</sub>\Au solar cell) stored in air without encapsulation for about 11 months. The performance factors include V<sub>oc</sub> (open circuit voltage), J<sub>sc</sub> (short-circuit current), FF (fill factor) and PCE(power conversion efficiency). For the Ag\ITO\Cu<sub>2</sub>O\ZnSnN<sub>2</sub>\Au solar cell, the statistics is based on 9 solar cells while the statistics is based on 8 solar cells for the Ag\ITO\Cu<sub>2</sub>O\ZnSnN<sub>2</sub>\Ag solar cell. The average V<sub>oc</sub>, J<sub>sc</sub>, FF and PCE of the solar cell with Au as the electrode are 0.22V, 1.75mA/cm<sup>2</sup>, 42% and 0.15% while those of the solar cell with Ag as the electrode are 0.19V, 0.34mA/cm<sup>2</sup>, 22% and 0.02%, respectively. Compared with the solar cell with Ag as the electrode, the solar cell with Au as the electrode has much larger J<sub>sc</sub> due to smaller series resistance and this leads to larger fill factor and higher photoelectric conversion efficiency. After stored in air for 11 months without encapsulation, though the performance degrades (the average V<sub>oc</sub>, J<sub>sc</sub>, FF and PCE of the solar cell with Au as the electrode are 0.06V, 0.56mA/cm<sup>2</sup>, 27% and 0.01% after stored in air for 11 months), photovoltaic effect is still observed. The performance degradation might be due to the storage in air without encapsulation.

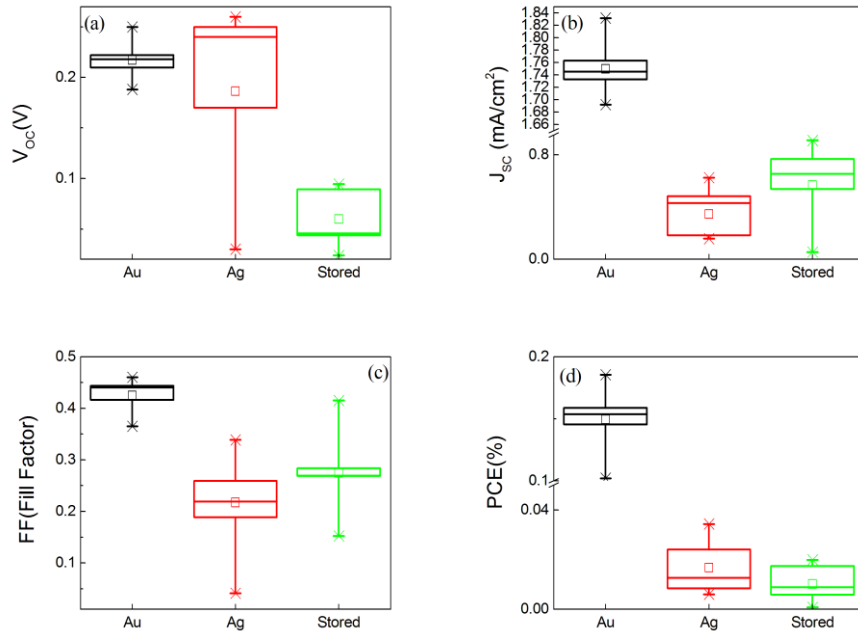

**Figure S7.** Statistical distribution of the performance factors for the solar cells: "Au" refers to the data from the Ag\ITO\Cu<sub>2</sub>O\ZnSnN<sub>2</sub>\Au solar cell without storage; "Ag" refers to the data from the Ag\ITO\Cu<sub>2</sub>O\ZnSnN<sub>2</sub>\Ag solar cell without storage; "Stored" refers to the data obtained after the Ag\ITO\Cu<sub>2</sub>O\ZnSnN<sub>2</sub>\Au solar cell has been stored in air without encapsulation for 11 months: (a) Open-circuit voltage  $V_{oc}$ ; (b) Short-circuit current density  $J_{sc}$ ; (c) FF(fill factor) and (d) PCE (power conversion efficiency).

The energy band gap diagram of Cu<sub>2</sub>O-ZnSnN<sub>2</sub> is present in **Figure S8** [6,7]. The electron affinity of Cu<sub>2</sub>O ( $\chi(\text{Cu}_2\text{O})$ ) is 3.1 eV [6]. The bandgap of Cu<sub>2</sub>O ( $E_g(\text{Cu}_2\text{O})$ ) is 2.1 eV and the gap between  $E_F$  and  $E_v$  ( $q\phi_p(\text{Cu}_2\text{O})$ ) is 0.36 eV [6]. The electron affinity of ZnSnN<sub>2</sub>,  $\chi$  is 3.9 eV. For ZnSnN<sub>2</sub>, the gap between  $E_c$  and  $E_F$ ,  $q\phi_n$  is estimated to be 0.18 eV ( $E_c - E_F$  is calculated to be 0.18 eV from  $n = N_c \exp[-(E_c - E_F)/kT]$  with  $n=10^{15}\text{cm}^{-3}$ ,  $N_c=1.04 \times 10^{18}\text{cm}^{-3}$ ,  $kT=0.026\text{eV}$ ). The band gap of ZnSnN<sub>2</sub>,  $E_g$ , is 2.5 eV.  $V_D$  is the built-in potential between Cu<sub>2</sub>O and ZnSnN<sub>2</sub>.  $V_D$  is estimated to be 0.76 V from  $\chi(\text{Cu}_2\text{O}) + E_g(\text{Cu}_2\text{O}) - q\phi_p(\text{Cu}_2\text{O}) = qV_D + \chi + q\phi_n$ . The conduction band discontinuity  $\Delta E_c$  is estimated to be 0.8 eV from  $E_g(\text{Cu}_2\text{O}) - q\phi_p(\text{Cu}_2\text{O}) = qV_D + \Delta E_c + q\phi_n$ . The valence band discontinuity  $\Delta E_v$  is estimated to be 1.2 eV from  $E_g - q\phi_n = q\phi_p(\text{Cu}_2\text{O}) + qV_D + \Delta E_v$ .

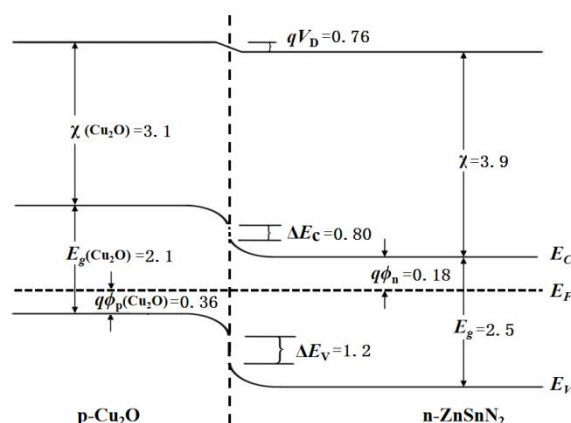

**Figure S8.** The energy band diagram of p-Cu<sub>2</sub>O and n-ZnSnN<sub>2</sub> at zero bias.

## Reference

- [1] P. C. Quayle, K. He, J. Shan, K. Kash, Synthesis, lattice structure, and band gap of ZnSnN<sub>2</sub>, MRS Commun. 3 (2013) 135-138.
- [2] P. C. Quayle, G. T. Junno, K. He, E. W. Blanton, J. Shan, K. Kash, Vapour-liquid-solid synthesis of ZnSnN<sub>2</sub>, Phys. Status Solidi B254 (2017) 1600718-1-1600718-6.
- [3] F. Ye, Q.Q. Chen, X.M. Cai, Y.Z. Xie, X.F. Ma, K. Vaithinathan, D.P. Zhang, P. Fan, V.A.L. Roy, Improving the chemical potential of nitrogen to tune the electron density and mobility of ZnSnN<sub>2</sub>, J. Mater. Chem. C 8 (2020) 4314-4320.
- [4] P. C. Quayle, E. W. Blanton, A. Punya, G. T. Junno, K. He, L. Han, H. Zhao, J. Shan, W. R. L. Lambrecht, K. Kash, Charge-neutral disorder and polytypes in heterovalent wurtzite-based ternary semiconductors: The importance of the octet rule, Phys. Rev. B91 (2015) 205207-1-205207-14.
- [5] S.M. Sze, K.K. Ng, Physics of semiconductor devices, 3rd edition(2006), Wiley Interscience, p.140.
- [6] B. K. Meyer, A. Polity, D. Reppin, M. Becker, P. Hering, P. J. Klar, Th. Sander, C. Reindl, J. Benz, M. Eickhoff, C. Heiliger, M. Heinemann, J. Bläsing, A. Krost, S. Shokovets, C. Müller, and C. Ronning, Binary copper oxide semiconductors: From materials towards devices, Phys. Status Solidi B 249(2012)1487–1509.
- [7] K.K. Chinnakutti, V. Panneerselvam, S.T. Salammal, Tailoring optoelectronic properties of earth abundant ZnSnN<sub>2</sub> by combinatorial RF magnetron sputtering, J. Alloys Compd. 772 (2019) 348-358.
